# Supplementary material for: Captopril as a nucleophile for ester cleavage. Formation of the thiolester S-benzoylcaptopril
Source: Royal Society of Chemistry journal article supplement (doi:10.1039/c5ra06900a), 2015-01-01

SUPPORTING INFORMATION

## Captopril as a nucleophile for ester cleavage. Formation of the thiolester S-benzoylcaptopril

Emilia Iglesias\*, and Isabel Brandariz

Facultad de Ciencias. Universidad de La Coruña. 15071-La Coruña (SPAIN). e-mail: [emilia.iglesias@udc.es](mailto:emilia.iglesias@udc.es)

**Figure S1.** Reaction spectra of PhB hydrolysis at (a)  $[\text{PhB}] = 0.20 \text{ mM}$ ,  $[\text{OH}^-] = 0.013 \text{ M}$ , scans at 2 min interval; and (b)  $[\text{PhB}] = 0.14 \text{ mM}$ ;  $[\text{OH}^-]_t = 6.0 \text{ mM}$ , and  $[\text{cap}] = 0.92 \text{ mM}$ ; scans at 2 min interval; (c) the same spectra as in (a) showing the expanded scale of the X-axis.

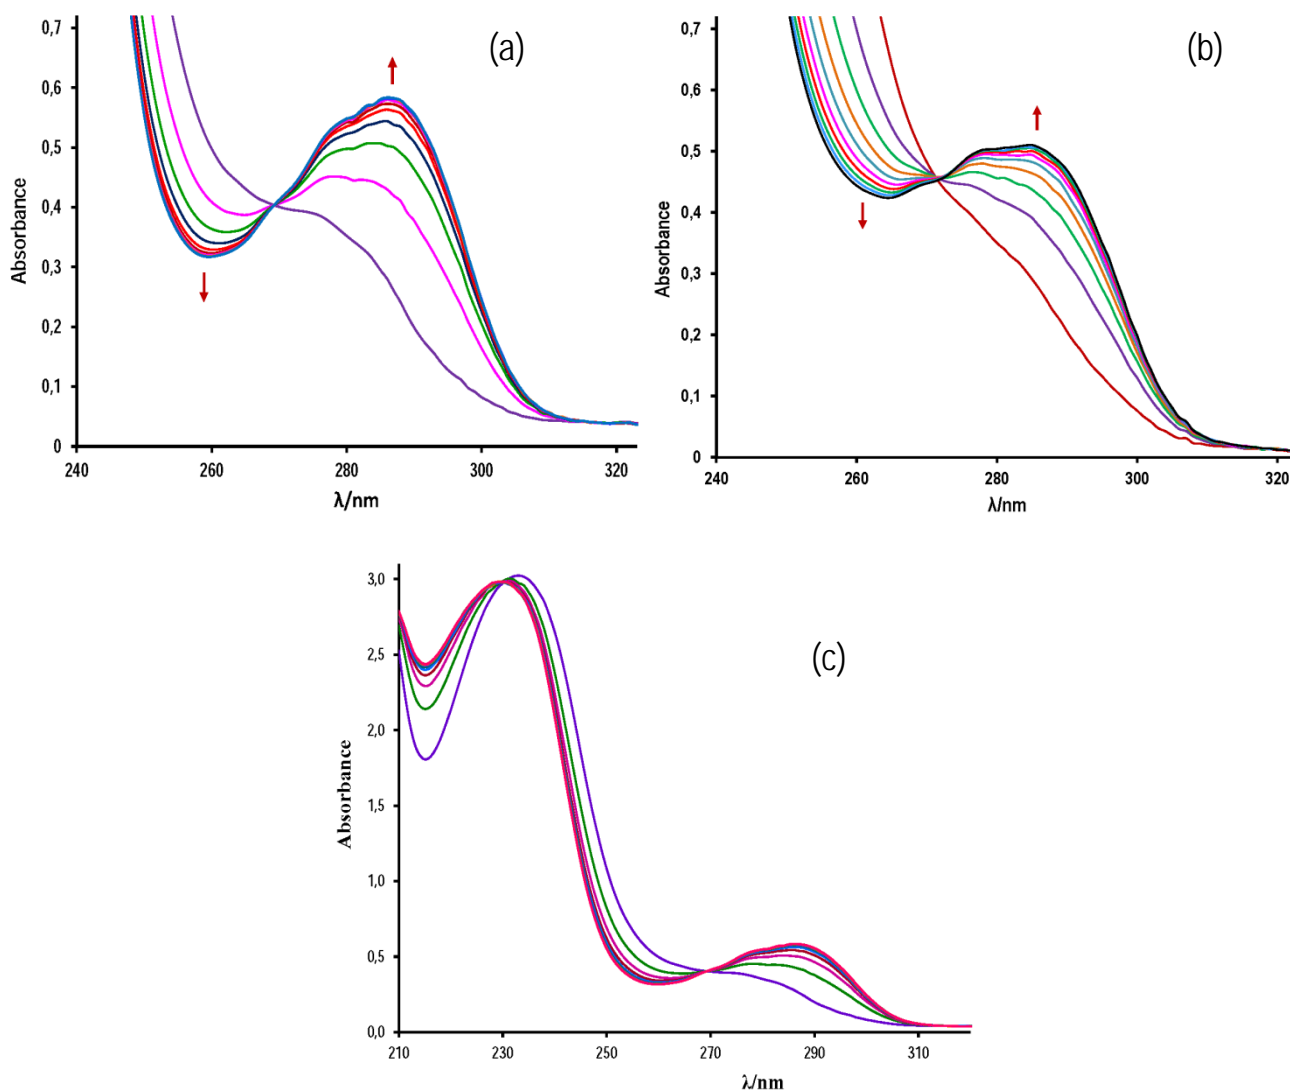

**Figure S2.** (a) Reaction spectra of ASA hydrolysis at  $[ASA]=0.23$  mM,  $[OH^-]=4.7$  mM, scans at 3 min interval, the dashed curve is at infinite time; and (b) reaction spectra of PhA hydrolysis at  $[PhA]=0.25$  mM;  $[OH^-]=4.5$  mM, and  $[cap]=3.45$  mM; scans at 1.5 min interval, dashed curve is at infinite time.

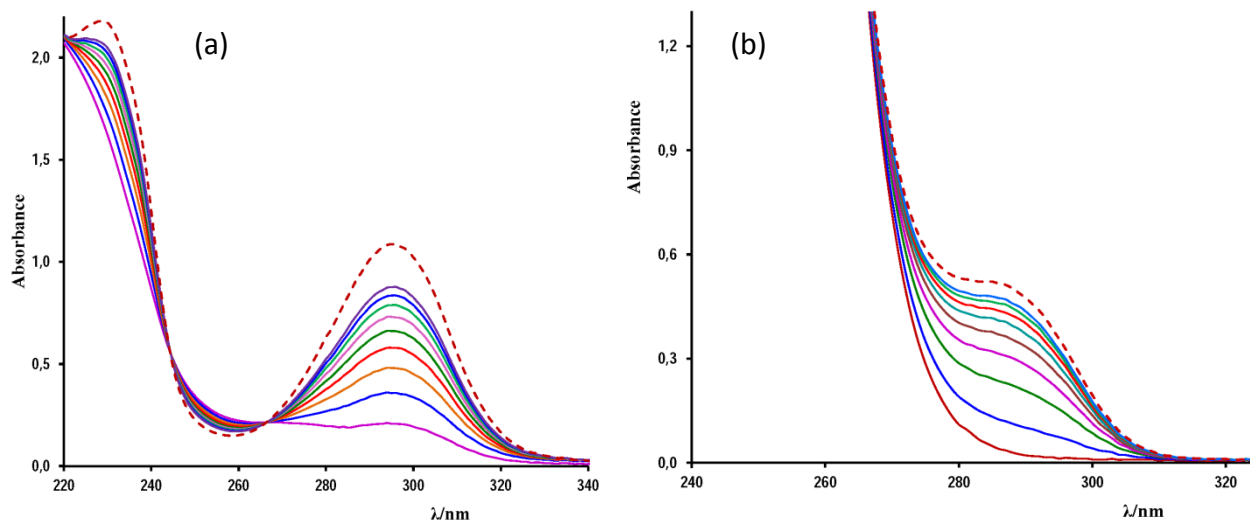

**Figure S3.** Eyring's plot corresponding to the alkaline hydrolysis of ASA; the datum signed with an arrow was determined in the present study, the others were taken from literature (see Table 1); ( $\blacklozenge$ ) not included in the linear correlation.

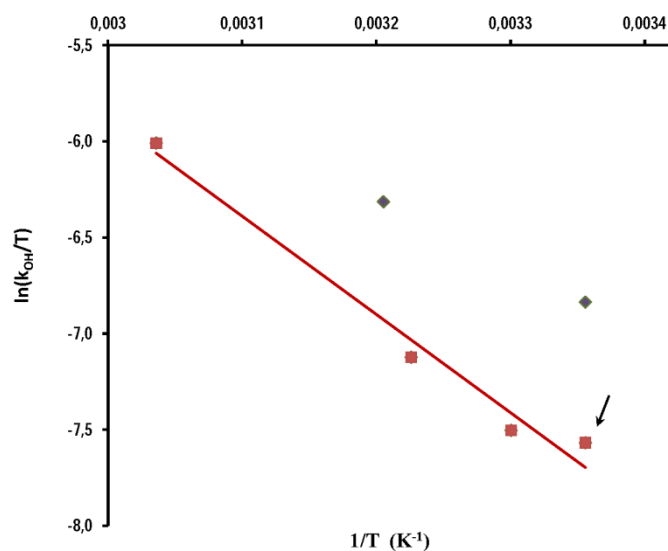

**Figure S4.** Influence of buffer concentration on the observed rate constant for the ester cleavage of PhB by captopril at pH 9.90 and [cap]=7.13 mM.  $k_o/s^{-1}=(7.0\pm 0.6)\cdot 10^{-4} + (7.5\pm 0.3)\cdot 10^{-4}[\text{buffer}]$ .

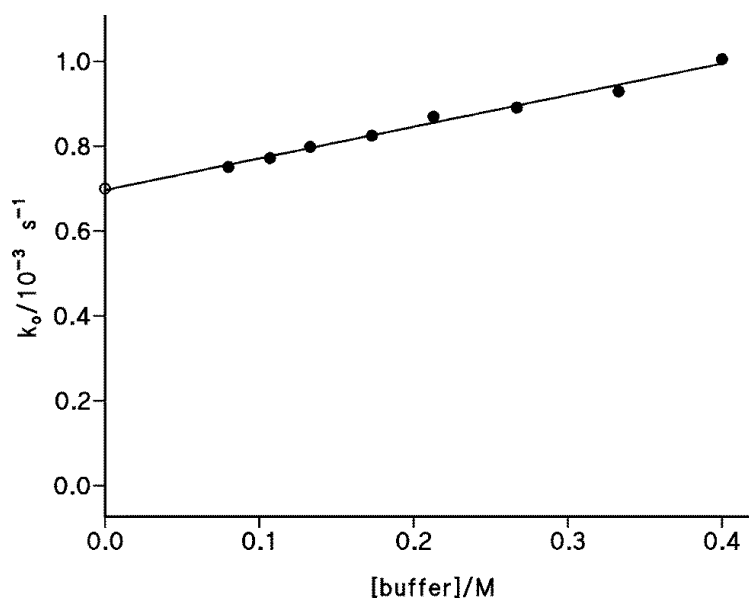

**Table S1.** Observed rate constants,  $k_o$ , obtained as a function of [TTABr] for the thiolysis of PhB by cap at 25 °C. See text and Figure S5 and Figure S6.

| [OH <sup>-</sup> ]=6.0 mM; [cap]=4.6 mM; 25 °C |              |              |                       | [OH <sup>-</sup> ]=1.0 mM; [cap]=3.4 mM; 25 °C |                     |                     |                       |
|------------------------------------------------|--------------|--------------|-----------------------|------------------------------------------------|---------------------|---------------------|-----------------------|
| [TTABr]/M                                      | $k_o/s^{-1}$ | $k^c/s^{-1}$ | $k^{cc}/M^{-1}s^{-1}$ | [TTABr]/M                                      | $k_o/10^{-3}s^{-1}$ | $k^c/10^{-3}s^{-1}$ | $k^{cc}/M^{-1}s^{-1}$ |
| 0,00267                                        | 0,00789      | 0,0113261    | 1,99082772            | 0,00267                                        | 0,005244            | 0,00752776          | 2,18276949            |
| 0,00333                                        | 0,00921      | 0,01717205   | 3,53105314            | 0,0040                                         | 0,00697             | 0,016031            | 5,36104186            |
| 0,00667                                        | 0,010738     | 0,0433332    | 12,6284449            | 0,00533                                        | 0,00789             | 0,02496791          | 9,30891819            |
| 0,010                                          | 0,010118     | 0,0627316    | 22,6554038            | 0,0080                                         | 0,00782             | 0,038318            | 17,0823767            |
| 0,0133                                         | 0,009044     | 0,07547218   | 32,2665518            | 0,01067                                        | 0,006842            | 0,04540009          | 23,4869458            |
| 0,020                                          | 0,007344     | 0,0932688    | 52,2936376            | 0,0133                                         | 0,006341            | 0,05291565          | 31,1042824            |
| 0,0267                                         | 0,005661     | 0,09654836   | 66,7629037            | 0,020                                          | 0,004537            | 0,0576199           | 44,1366205            |
| 0,040                                          | 0,004172     | 0,1072204    | 102,15733             | 0,0267                                         | 0,003614            | 0,06163677          | 58,2009373            |
| 0,0533                                         | 0,003231     | 0,1109687    | 134,620354            | 0,040                                          | 0,002433            | 0,0625281           | 81,1280981            |
| 0,080                                          | 0,00216      | 0,111672     | 193,685885            | 0,0533                                         | 0,001922            | 0,06601109          | 108,998434            |
| 0,107                                          | 0,001676     | 0,116063     | 262,70643             | 0,080                                          | 0,00137             | 0,070829            | 167,260995            |
| 0,133                                          | 0,001294     | 0,1114781    | 308,646035            | 0,1067                                         | 0,0010993           | 0,07591216          | 233,224048            |
|                                                |              |              |                       | 0,160                                          | 0,000685            | 0,0710345           | 318,756719            |

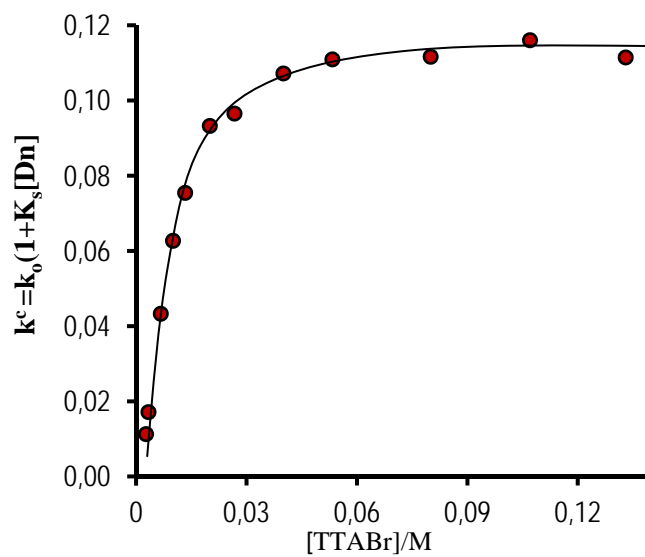

**Figure S5.** Variation of  $k^c (=1+K_s[Dn])$ ; with  $K_s=650 \text{ M}^{-1}$  and  $\text{cmc}=2 \text{ mM}$  against [TTABr] for the cap-thiolysis of PhB at  $[\text{OH}^-]=6.0 \text{ mM}$

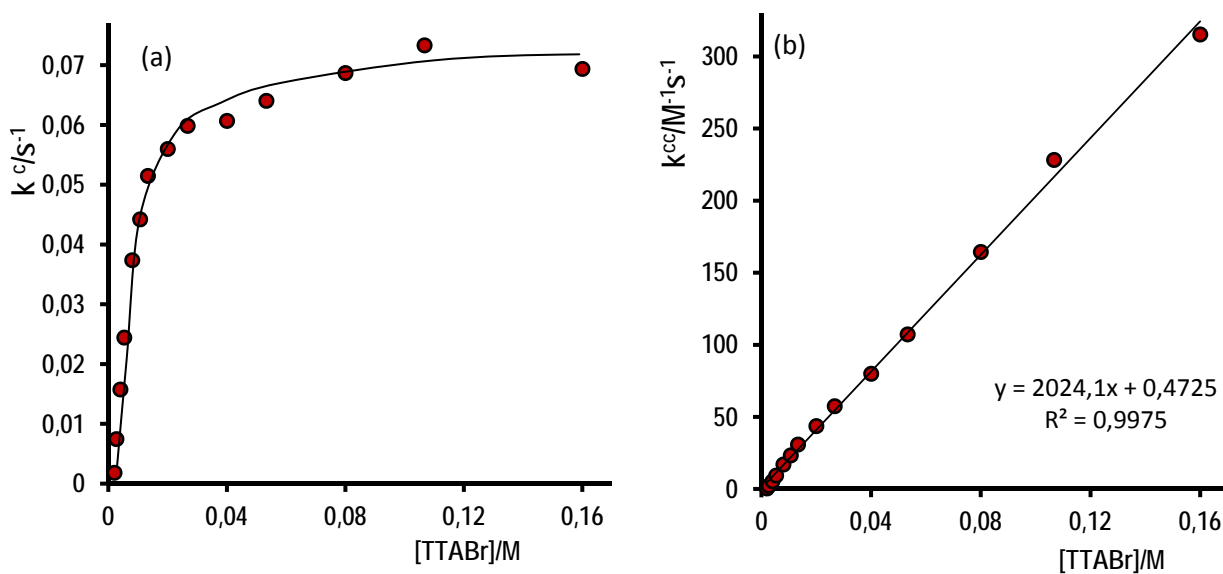

**Figure S6.** (a) Variation of  $k^c (=1+K_s[Dn])$ ; with  $K_s=630 \text{ M}^{-1}$  and  $\text{cmc}=2 \text{ mM}$  against [TTABr] and of (b)  $k^{cc}$  as a function of [TTABr] for the cap-thiolysis of PhB at  $[\text{OH}^-]=1.0 \text{ mM}$ .

**Figure S7.** Plot of  $k_o$  as a function of [cys] for the cleavage of ( $\blacktriangle$ )PhA ( $\bullet$ )PhB and ( $\blacktriangledown$ )ASA under alkaline conditions of  $[\text{OH}]_f=1.0 \text{ mM}$

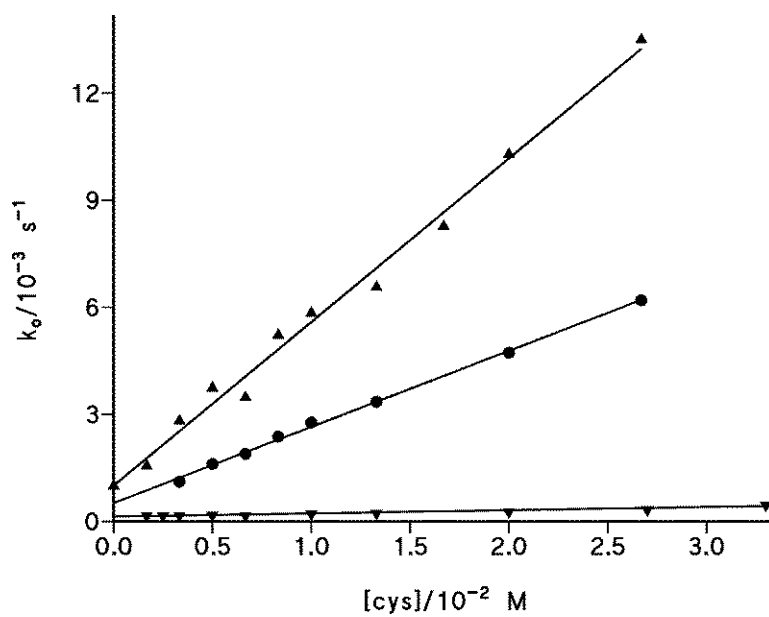

Supplement: c5ra06900a1.pdf [file c5ra06900a1.pdf]
